# Supplementary material for: A Regional, Honey Bee-Centered Approach Is Needed to Incentivize Grower Adoption of Bee-Friendly Practices in the Almond Industry
Source: Frontiers journal article supplement (doi:10.3389/fsufs.2021.628802), 2021-08-06
Supplement: Table_1.pdf [file Table_1.pdf]

**Regional, honey-bee centered approach needed to incentivize grower adoption of bee-friendly practices in agriculture –Jennie L. Durant and Lauren C. Ponisio**

**Appendix**

| Region                             | Total growers*               | Region total acreage** | Survey growers | Region survey acreage                | % of grower total in census | % of grower total in survey |
|------------------------------------|------------------------------|------------------------|----------------|--------------------------------------|-----------------------------|-----------------------------|
| Sac Valley                         | 1171                         | 206,200                | 52             | 18,758                               | 17.9                        | 15.8                        |
| NSJV                               | 3731                         | 520,513                | 189            | 97,079                               | 57.0                        | 57.4                        |
| SSJV                               | 1638                         | 524,157                | 88             | 96,579                               | 25.0                        | 26.7                        |
|                                    |                              |                        |                |                                      |                             |                             |
| *Growers with bearing acreage only | Total growers in CV          |                        | 6540           | Total respondents                    | 329                         |                             |
|                                    | Total CV almond acreage 2017 |                        | 1,250,870      | Total acreage in survey              | 212,416                     |                             |
|                                    |                              |                        |                | % of total CV almond acreage in 2017 | 17                          |                             |
| **Bearing and non-bearing acreage  |                              |                        |                |                                      |                             |                             |

*Table A Comparison of growers and acreage data between survey and 2017 almond industry census (USDA-NASS, 2019, 46 and 512). CV = Central Valley, Sac Valley = Sacramento Valley, NSJV = North San Joaquin Valley, SSJV = South San Joaquin Valley. Data in columns titled “Total growers” and “Regional total acreage” are from the 2017 Census. Only data on growers with bearing acreage were used in column 2 (Total Growers) because they would have required colonies in their orchards during bloom. However, in column 3 (Regional total Acreage) we used the total bearing and non-bearing acreage data because practices such as cover crops, pesticide use, and permanent pollinator habitat could be practiced on all orchard acreage, and this total is reflected in the sum of “Total CV almond acreage 2017.” The close percentages of the region totals in the 2017 Census data and our survey data (columns 6 and 7) suggest that our survey sample is regionally representative.*

| Acreage ranges | Census %    | Survey %   |
|----------------|-------------|------------|
| 1 to 49        | 53.2        | 40.4       |
| 50-99          | 15.8        | 17.0       |
| 100-249        | 16.8        | 15.8       |
| 259-1000       | 11.9        | 15.2       |
| 1000+          | 2.3         | 11.6       |
| <b>Total #</b> | <b>7611</b> | <b>329</b> |

*Table B Comparison of growers’ acreage range data between survey and 2017 almond industry census (USDA-NASS, 2019, 46). There were 7611 total almond growers in California (with bearing and non-bearing acreage) in 2017 and 329 respondents in our survey. We used the bearing and non-bearing acreage data because practices such as cover crops, pesticide use, and permanent pollinator habitat could be practiced on all orchard acreage. In the survey, growers who farmed over 250 acres were overrepresented by ~12% compared to 2017 census data, while those who farm 49 acres or less are underrepresented by the same amount. Mid-size growers who farm 50-150 acres are similarly represented. This discrepancy may be because, we had to use census data on the entire almond industry for this comparison, rather than just the Central Valley where there are operations with very large acreage sizes. For example, Kern county has an average operation size of ~655 acres per grower (Table A).*

**Regional, honey-bee centered approach needed to incentivize grower adoption of bee-friendly practices in agriculture –Jennie L. Durant and Lauren C. Ponisio**

|                                       | Estimate | Std. Error | Adjusted SE | z value | Pr(> z ) | Estimate.ci.ub | Estimate.ci.lb | P1    |
|---------------------------------------|----------|------------|-------------|---------|----------|----------------|----------------|-------|
| (Intercept)                           | -1.018   | 0.692      | 0.695       | 1.466   | 0.143    | 0.339          | -2.375         | 0.265 |
| CostBeeColoniesModerate concern       | -1.24    | 0.61       | 0.612       | 2.025   | 0.043    | -0.045         | -2.436         | 0.095 |
| CostBeeColoniesStrong concern         | -1.682   | 0.583      | 0.585       | 2.875   | 0.004    | -0.54          | -2.823         | 0.063 |
| LackAvailableColoniesModerate concern | 1.427    | 0.636      | 0.639       | 2.234   | 0.025    | 2.674          | 0.18           | 0.601 |
| LackAvailableColoniesStrong concern   | 1.627    | 0.631      | 0.634       | 2.568   | 0.01     | 2.864          | 0.39           | 0.648 |
| NewRegionNorth San Joaquin            | 0.196    | 0.304      | 0.305       | 0.642   | 0.521    | 0.791          | -0.399         | 0.305 |
| NewRegionSacramento Valley            | 1.741    | 0.401      | 0.403       | 4.322   | 0        | 2.528          | 0.955          | 0.673 |
| scale(log(TotalAcreage))              | 0.211    | 0.128      | 0.129       | 1.642   | 0.101    | 0.462          | -0.04          | 0.309 |
| Influential_PCA1                      | 0.307    | 0.256      | 0.257       | 1.193   | 0.233    | 0.808          | -0.195         | 0.329 |
| LossNativePollinatorsModerate concern | -0.381   | 0.416      | 0.417       | 0.913   | 0.361    | 0.434          | -1.196         | 0.198 |
| LossNativePollinatorsStrong concern   | 0.146    | 0.433      | 0.435       | 0.337   | 0.736    | 0.996          | -0.703         | 0.295 |
| MajorityOwn1                          | -0.352   | 0.358      | 0.359       | 0.982   | 0.326    | 0.348          | -1.053         | 0.203 |
| InfluentialPeopleBeekeeper1           | 0.219    | 0.268      | 0.269       | 0.816   | 0.415    | 0.744          | -0.306         | 0.31  |

*Table C: **Cover Crops**: Estimates, their standard errors, test statistics, and p-values from the Binomial GLMs of the variables affecting cover crop adoption within past 5 years. Coefficients are on a logit scale. Because most of the variables are categorical, the coefficients estimate the difference between each category and the intercept. The intercept is set as “No concern” for bee concern variables, “Not influential” for each influential person, and South San Joaquin for region. Estimates above zero represent an increase in the probability of cover crop adoption relative to the intercept, and below zero represent a decrease in cover crop adoption relative to the intercept. Total acreage is the only continuous variable, and therefore the coefficient is the estimate of the slope of cover crop adoption for every unit increase in operation size (log). P1 the probability of adoption for each variable level, calculated as the exponent of the estimate + the intercept.*

|                                           | Estimate | Std. Error | Adjusted SE | z value | Pr(> z ) | Estimate.ci.ub | Estimate.ci.lb | P1    |
|-------------------------------------------|----------|------------|-------------|---------|----------|----------------|----------------|-------|
| (Intercept)                               | -2.335   | 1.115      | 1.119       | 2.087   | 0.037    | -0.15          | -4.521         | 0.088 |
| CostBeeColoniesModerate concern           | 1.206    | 0.851      | 0.855       | 1.411   | 0.158    | 2.874          | -0.462         | 0.244 |
| CostBeeColoniesStrong concern             | 0.543    | 0.833      | 0.837       | 0.648   | 0.517    | 2.176          | -1.091         | 0.143 |
| HBCStrengthSatisfactionSomewhat satisfied | -0.582   | 0.421      | 0.422       | 1.378   | 0.168    | 0.242          | -1.406         | 0.051 |
| HBCStrengthSatisfactionVery satisfied     | -1.047   | 0.413      | 0.415       | 2.522   | 0.012    | -0.237         | -1.857         | 0.033 |
| InfluentialPeopleBee_broker1              | 1.038    | 0.559      | 0.562       | 1.848   | 0.065    | 2.135          | -0.058         | 0.215 |
| LossNativePollinatorsModerate concern     | 0.303    | 0.543      | 0.545       | 0.556   | 0.578    | 1.366          | -0.761         | 0.116 |
| LossNativePollinatorsStrong concern       | 0.991    | 0.538      | 0.54        | 1.834   | 0.067    | 2.045          | -0.063         | 0.207 |
| NewRegionNorth San Joaquin                | 0.55     | 0.396      | 0.398       | 1.382   | 0.167    | 1.326          | -0.227         | 0.144 |
| NewRegionSacramento Valley                | 1.065    | 0.48       | 0.482       | 2.21    | 0.027    | 2.006          | 0.125          | 0.219 |
| scale(log(TotalAcreage))                  | 0.31     | 0.153      | 0.154       | 2.021   | 0.043    | 0.61           | 0.011          | 0.117 |
| Influential_PCA1                          | 0.49     | 0.316      | 0.317       | 1.547   | 0.122    | 1.109          | -0.128         | 0.136 |
| DecliningBeeHealthModerate concern        | 1.169    | 1.146      | 1.151       | 1.016   | 0.31     | 3.415          | -1.076         | 0.238 |
| DecliningBeeHealthStrong concern          | 0.532    | 1.16       | 1.165       | 0.457   | 0.648    | 2.805          | -1.741         | 0.141 |
| MajorityOwn1                              | 0.216    | 0.434      | 0.436       | 0.495   | 0.621    | 1.066          | -0.634         | 0.107 |

*Table D: **Permanent pollinator habitat**: Estimates, their standard errors, test statistics, p-values and probability of adoption from the Binomial GLMs of the variables affecting permanent pollinator habitat adoption. Coefficients are on a logit scale. The intercept is set as “No concern” for bee concern variables, “Unsatisfied/Prefer not to answer” for honey bee colony (HBC) strength satisfaction, “Not influential” for each influential person, and South San Joaquin for region.*

**Regional, honey-bee centered approach needed to incentivize grower adoption of bee-friendly practices in agriculture –Jennie L. Durant and Lauren C. Ponisio**

|                                    | Estimate | Std. Error | Adjusted SE | z value | Pr(> z ) | Estimate.ci.ub | Estimate.ci.lb | P1    |
|------------------------------------|----------|------------|-------------|---------|----------|----------------|----------------|-------|
| (Intercept)                        | 0.476    | 0.585      | 0.587       | 0.811   | 0.417    | 1.623          | -0.671         | 0.617 |
| DecliningBeeHealthModerate concern | -1.725   | 0.606      | 0.608       | 2.838   | 0.005    | -0.538         | -2.912         | 0.223 |
| DecliningBeeHealthStrong concern   | -0.755   | 0.561      | 0.564       | 1.34    | 0.18     | 0.345          | -1.856         | 0.431 |
| NewRegionNorth San Joaquin         | -0.475   | 0.287      | 0.288       | 1.648   | 0.099    | 0.088          | -1.037         | 0.5   |
| NewRegionSacramento Valley         | -1.094   | 0.44       | 0.441       | 2.479   | 0.013    | -0.232         | -1.956         | 0.35  |
| scale(log(TotalAcreage))           | -0.204   | 0.132      | 0.132       | 1.538   | 0.124    | 0.055          | -0.462         | 0.568 |
| InfluentialPeopleBeekeeper1        | 0.257    | 0.272      | 0.273       | 0.942   | 0.346    | 0.789          | -0.275         | 0.676 |
| Influential_PCA1                   | 0.097    | 0.259      | 0.26        | 0.372   | 0.71     | 0.605          | -0.411         | 0.64  |

*Table E Recommended Honey bee BMPs: Estimates, their standard errors, test statistics, p-values and probability of adoption from the Binominal GLMs of the variables affecting Almond Board's recommended Best Management Practice (BMP) adoption. Coefficients are on a logit scale. The intercept is set as "No concern" for bee concern variables, "Not influential" for each influential person, and South San Joaquin for region.*

|                                           | Estimate | Std. Error | Adjusted SE | z value | Pr(> z ) | Estimate.ci.ub | Estimate.ci.lb | P1    |
|-------------------------------------------|----------|------------|-------------|---------|----------|----------------|----------------|-------|
| (Intercept)                               | -0.064   | 0.379      | 0.38        | 0.169   | 0.866    | 0.678          | -0.807         | 0.484 |
| HBCStrengthSatisfactionSomewhat satisfied | 0.813    | 0.331      | 0.332       | 2.447   | 0.014    | 1.462          | 0.164          | 0.679 |
| HBCStrengthSatisfactionVery satisfied     | 1.192    | 0.318      | 0.319       | 3.736   | 0        | 1.815          | 0.569          | 0.755 |
| Influential_PCA1                          | -0.628   | 0.246      | 0.247       | 2.544   | 0.011    | -0.146         | -1.109         | 0.334 |
| InfluentialPeopleBee_broker1              | -0.933   | 0.435      | 0.437       | 2.138   | 0.033    | -0.081         | -1.786         | 0.269 |
| NewRegionNorth San Joaquin                | 0.452    | 0.275      | 0.276       | 1.639   | 0.101    | 0.99           | -0.086         | 0.596 |
| NewRegionSacramento Valley                | 0.423    | 0.372      | 0.374       | 1.132   | 0.257    | 1.152          | -0.306         | 0.589 |
| scale(log(TotalAcreage))                  | -0.101   | 0.118      | 0.119       | 0.851   | 0.395    | 0.131          | -0.333         | 0.459 |
| LackSkilledBeekeeperModerate concern      | -0.549   | 0.359      | 0.361       | 1.523   | 0.128    | 0.155          | -1.253         | 0.351 |
| LackSkilledBeekeeperStrong concern        | -0.329   | 0.354      | 0.355       | 0.925   | 0.355    | 0.365          | -1.022         | 0.403 |
| LackAvailableColoniesModerate concern     | -0.455   | 0.46       | 0.462       | 0.987   | 0.324    | 0.446          | -1.357         | 0.373 |
| LackAvailableColoniesStrong concern       | -0.113   | 0.442      | 0.444       | 0.254   | 0.8      | 0.754          | -0.979         | 0.456 |

*Table F Legally obligated Honey bee BMPs: Estimates, their standard errors, test statistics, p-values and probability of adoption from the Binomial GLMs of the variables affecting legally obligated BMP adoption. Coefficients are on a logit scale. The intercept is set as "No concern" for bee concern variables, "Unsatisfied/Prefer not to answer" for honey bee colony (HBC) strength satisfaction, "Not influential" for each influential person, and South San Joaquin for region.*

**Regional, honey-bee centered approach needed to incentivize grower adoption of bee-friendly practices in agriculture –Jennie L. Durant and Lauren C. Ponisio**

|                                          | Estimate | Std. Error | Adjusted SE | z value | Pr(> z ) | Estimate.ci.ub | Estimate.ci.lb | P1    |
|------------------------------------------|----------|------------|-------------|---------|----------|----------------|----------------|-------|
| (Intercept)                              | 0.482    | 0.574      | 0.576       | 0.837   | 0.403    | 1.607          | -0.643         | 0.618 |
| AnyHabitat1                              | 0.82     | 0.334      | 0.335       | 2.448   | 0.014    | 1.475          | 0.166          | 0.786 |
| HBCPriceSatisfactionInexpensive          | -1.793   | 0.724      | 0.726       | 2.467   | 0.014    | -0.374         | -3.211         | 0.212 |
| HBCPriceSatisfactionA fair price         | 0.166    | 0.355      | 0.356       | 0.466   | 0.641    | 0.861          | -0.529         | 0.657 |
| HBCPriceSatisfactionPrefer not to answer | -0.458   | 0.402      | 0.403       | 1.136   | 0.256    | 0.329          | -1.245         | 0.506 |
| InfluentialPeopleBee_broker1             | 1.249    | 0.784      | 0.787       | 1.588   | 0.112    | 2.785          | -0.287         | 0.85  |
| LackAvailableColoniesModerate concern    | -0.025   | 0.525      | 0.527       | 0.047   | 0.963    | 1.004          | -1.053         | 0.612 |
| LackAvailableColoniesStrong concern      | 0.944    | 0.525      | 0.527       | 1.789   | 0.074    | 1.974          | -0.086         | 0.806 |
| NewRegionNorth San Joaquin               | -0.274   | 0.349      | 0.351       | 0.783   | 0.434    | 0.41           | -0.959         | 0.552 |
| NewRegionSacramento Valley               | 1.315    | 0.652      | 0.654       | 2.01    | 0.044    | 2.592          | 0.038          | 0.858 |
| scale(log(TotalAcreage))                 | 0.296    | 0.168      | 0.168       | 1.758   | 0.079    | 0.624          | -0.033         | 0.685 |
| Influential_PCA1                         | 0.316    | 0.313      | 0.314       | 1.007   | 0.314    | 0.929          | -0.297         | 0.69  |
| LossNativePollinatorsModerate concern    | 0.329    | 0.431      | 0.432       | 0.761   | 0.447    | 1.173          | -0.515         | 0.692 |
| LossNativePollinatorsStrong concern      | 0.751    | 0.482      | 0.484       | 1.552   | 0.121    | 1.696          | -0.194         | 0.774 |

*Table G Interest in a Bee-Friendly Certification: Estimates, their standard errors, test statistics, p-values and probability of adoption from the GLMs of the variables affecting bee-friendly certification interest. Coefficients are on a logit scale. The intercept is set as “No concern” for bee concern variables, “Too expensive” for honey bee colony (HBC) price satisfaction, “No” for each influential person”, and South San Joaquin for region.*
